# Supplementary material for: Restriction Landmark Genomic Scanning (RLGS) spot identification by second generation virtual RLGS in multiple genomes with multiple enzyme combinations
Source: PubMed Central journal article supplement (PMC2235865; doi:10.1186/1471-2164-8-446), 2007-11-30

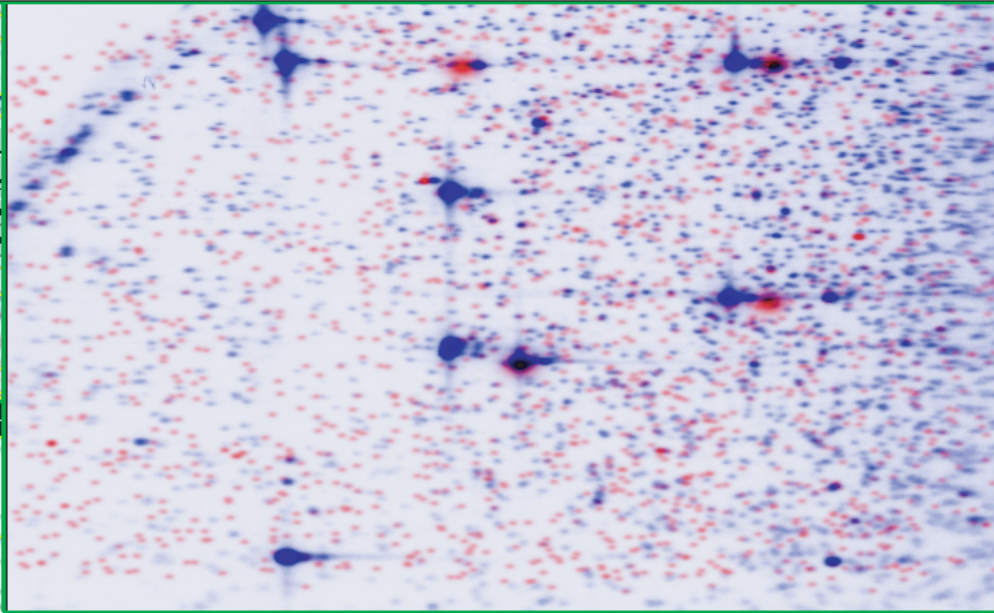

Human Ascl - EcoRV - HinfI actual gel

Human Ascl - EcoRV - HinfI virtual gel

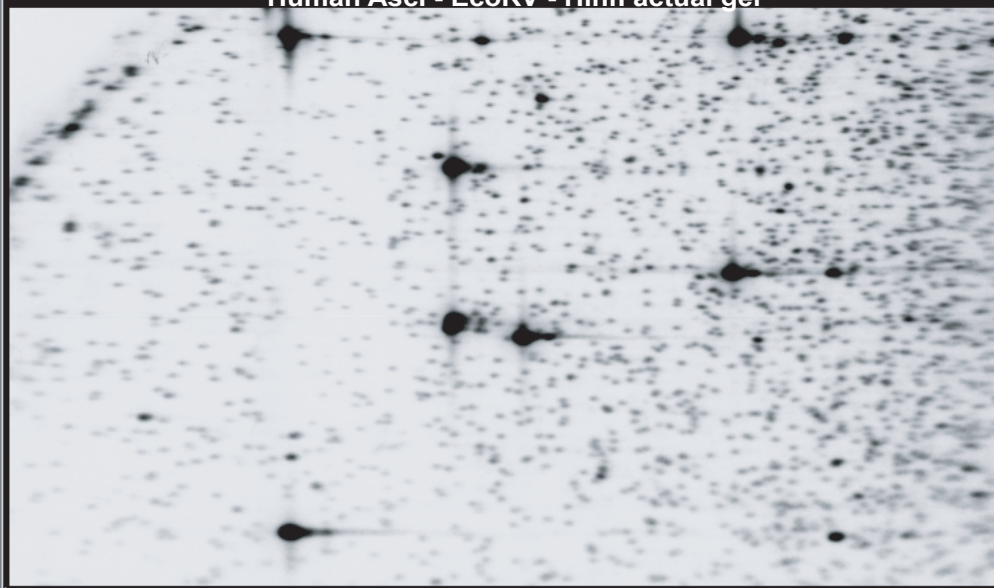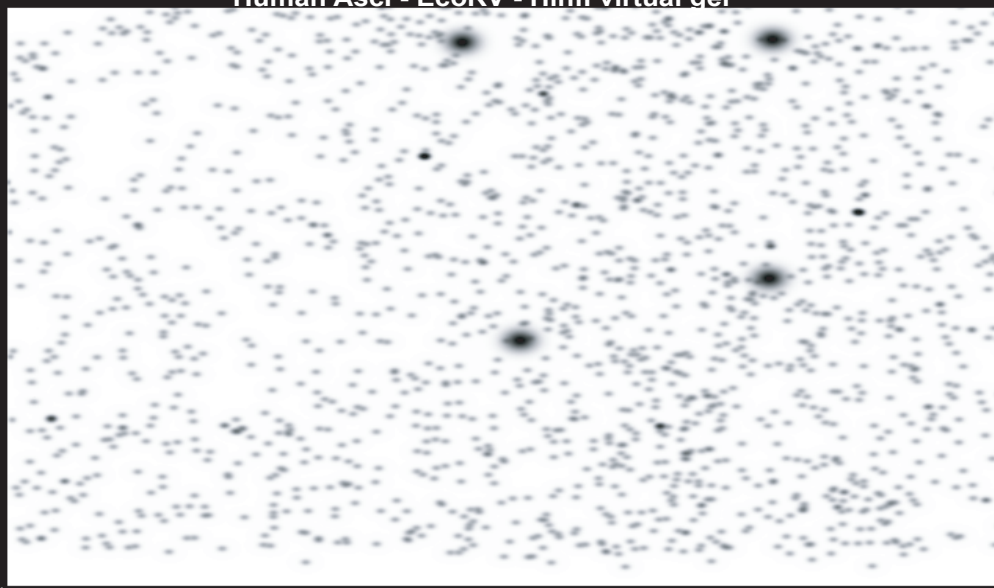

Supplement: 1471-2164-8-446-S1.pdf [file 1471-2164-8-446-S1.pdf]
